# Supplementary material for: Additional risk of diabetes exceeds the increased risk of cancer caused by radiation exposure after the Fukushima disaster
Source: PLOS journal article supplement (doi:10.1371/journal.pone.0185259), 2017-09-28
Supplement: S2 (10.1371/journal.pone.0185259.s002) [file journal.pone.0185259.s002]

**S1 Table.**

Numbers of male patients with diabetes and total participants, and the prevalence before and after the disaster. The values in parenthesis represent 95% confidence interval.

|                                           | 40–43         | 44–49        | 50–53        | 54–59        | 60–63         | 64–69         | 70–           |
|-------------------------------------------|---------------|--------------|--------------|--------------|---------------|---------------|---------------|
| Patients with diabetes/total participants |               |              |              |              |               |               |               |
| 2008                                      | 1/36          | 7/112        | 1/89         | 36/313       | 44/355        | 86/800        | 12/186        |
| 2009                                      | 1/28          | 6/100        | 4/102        | 33/258       | 43/383        | 84/776        | 36/310        |
| 2010                                      | 2/44          | 2/90         | 5/92         | 28/250       | 51/412        | 94/789        | 54/470        |
| 2011                                      | 0/16          | 1/47         | 4/63         | 15/124       | 23/168        | 48/420        | 56/420        |
| 2012                                      | 2/16          | 2/57         | 4/79         | 19/171       | 32/223        | 84/652        | 100/640       |
| 2013                                      | 0/7           | 2/54         | 8/74         | 19/139       | 28/194        | 99/626        | 122/641       |
| 2014                                      | 0/4           | 3/40         | 6/67         | 15/117       | 27/169        | 93/560        | 114/667       |
| Before the disaster                       | 4/108         | 15/302       | 10/283       | 97/821       | 138/1150      | 264/2365      | 102/966       |
| After the disaster <sup>a</sup>           | 2/27          | 7/151        | 18/220       | 53/427       | 87/586        | 276/1838      | 336/1948      |
| Prevalence                                |               |              |              |              |               |               |               |
| Before the disaster                       | 3.7%          | 5.0%         | 3.5%         | 11.8%        | 12.0%         | 11.2%         | 10.6%         |
|                                           | (0.1%–7.3%)   | (2.5%–7.4%)  | (1.4%–5.7%)  | (9.6%–14.0%) | (10.1%–13.9%) | (9.9%–12.4%)  | (8.6%–12.5%)  |
| After the disaster <sup>a</sup>           | 7.4%          | 4.6%         | 8.2%         | 12.4%        | 14.8%         | 15.0%         | 17.2%         |
|                                           | (–2.5%–17.3%) | (1.3%–8.0%)  | (4.6%–11.8%) | (9.3%–15.5%) | (12.0%–17.7%) | (13.4%–16.6%) | (15.6%–18.9%) |
| Δ                                         | 3.7%          | –0.3%        | 4.6%         | 0.6%         | 2.8%          | 3.9%          | 6.7%          |
|                                           | (–6.8%–14.2%) | (–4.5%–3.8%) | (0.4%–8.9%)  | (–3.2%–4.4%) | (–0.6%–6.3%)  | (1.8%–5.9%)   | (4.1%–9.3%)   |

<sup>a</sup> Results in 2011 were excluded owing to potential biases of participants.
